# Supplementary material
Source: PubMed Central journal article supplement (PMC8713126)
Supplement: mmc2.pdf [file mmc2.pdf]

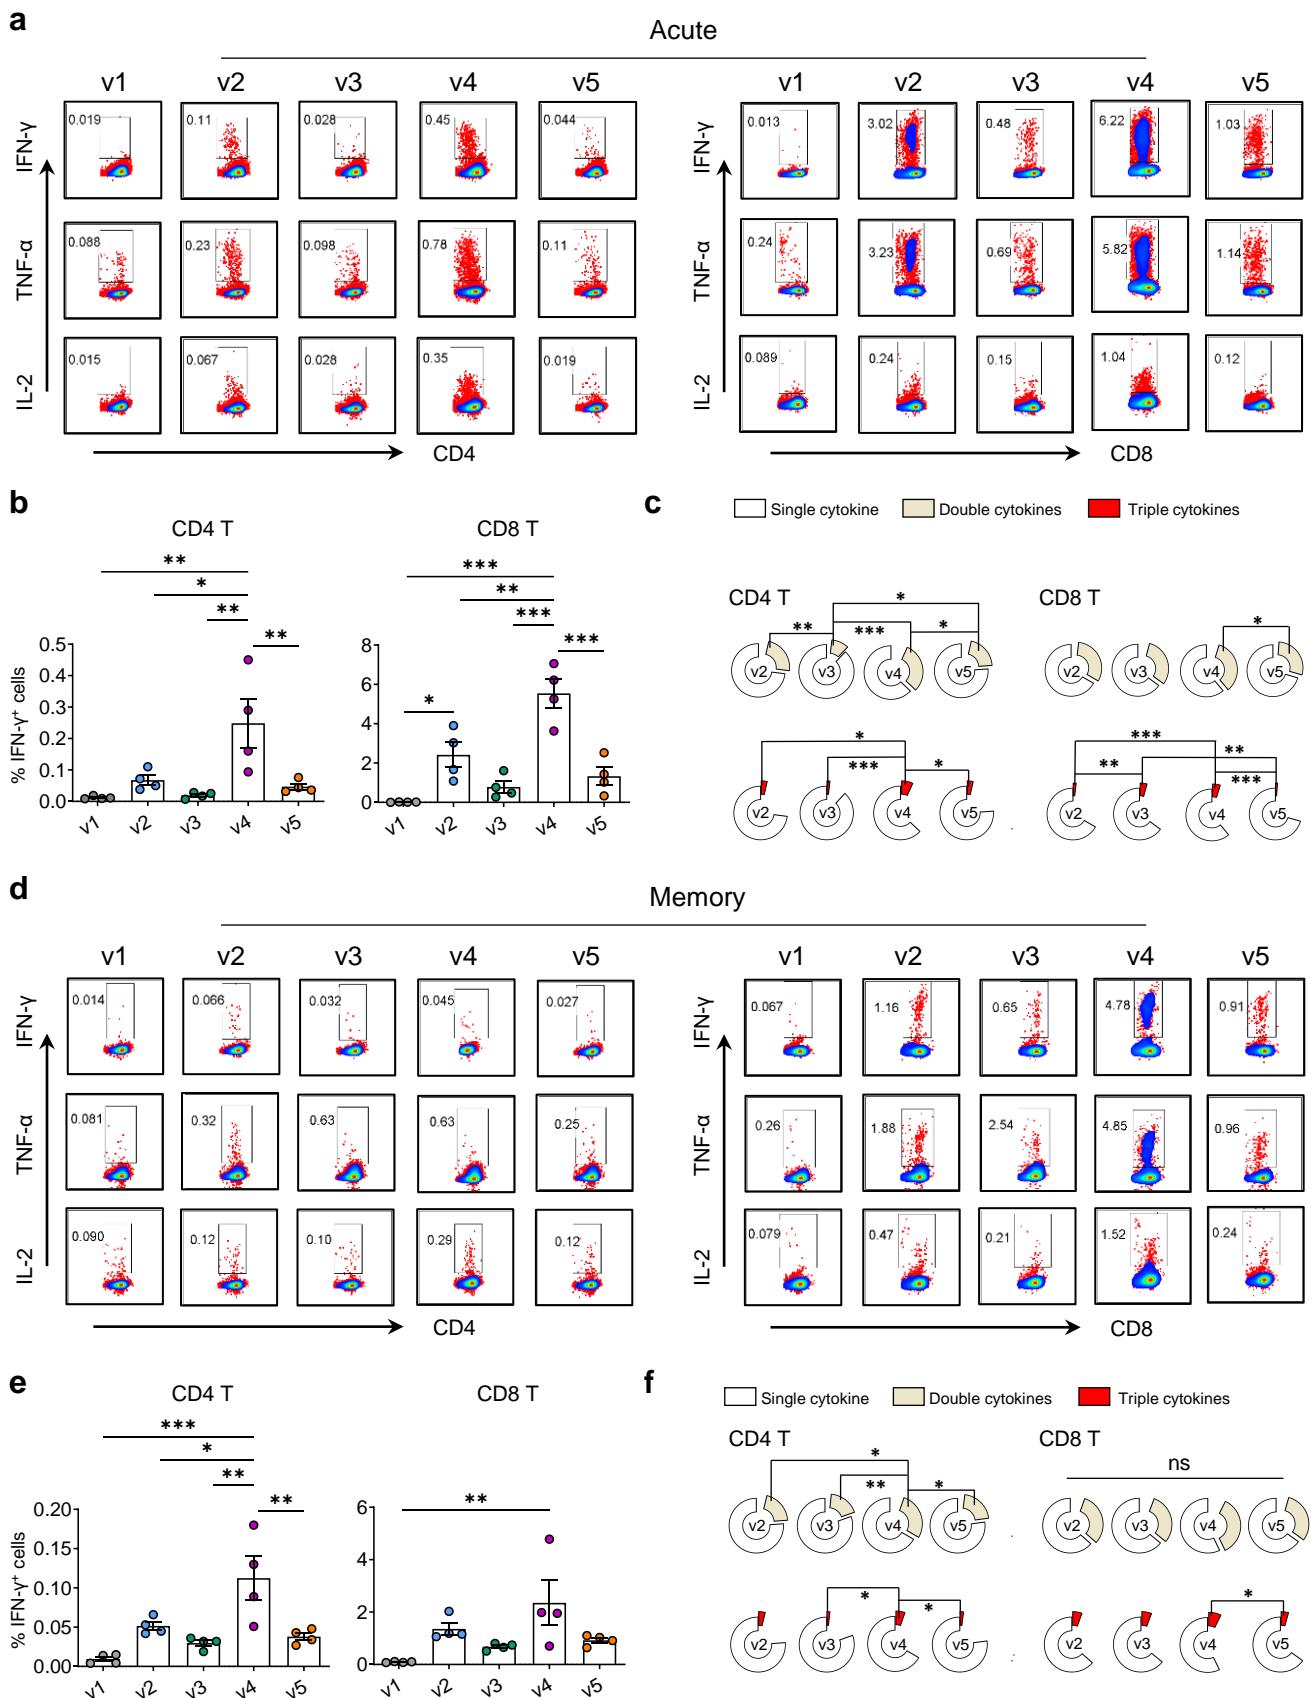

**Fig. S2. Vaccine-induced acute and memory RBD-specific T cell responses in spleen.** The vaccine immunization schedule for BALB/c mice was the same as described in Figure 1a. Splenocytes were collected and subjected to T cell response analysis at day-9 (acute) and day-48 (memory) post the 2<sup>nd</sup> immunization. SARS-CoV-2 RBD-specific T cell responses in the spleen were detected by *ex vivo* RBD peptide pool stimulation followed by ICS at both acute (a-c) and memory (d-f) phase. (a, d) Representative dot plots present the gating of IFN-γ<sup>+</sup>, TNF-α<sup>+</sup> or IL-2<sup>+</sup> CD4 T (left) and CD8 T (right) against SARS-CoV-2 RBD. (b, e) Quantified results depict the percentage of IFN-γ<sup>+</sup> CD4 T (left) and IFN-γ<sup>+</sup> CD8 T (right). Each symbol represents an individual mouse. Error bars indicate the standard error of the mean. (c, f) The pie charts indicate the proportion of single or double or triple cytokines produced by CD4 T (left) and CD8 T (right). Statistics were generated using one-way ANOVA followed by Tukey's multiple comparisons test. \*p<0.05; \*\*p<0.01; \*\*\*p<0.001.
