# Supplementary material
Source: PubMed Central journal article supplement (PMC8713126)
Supplement: mmc4.pdf [file mmc4.pdf]

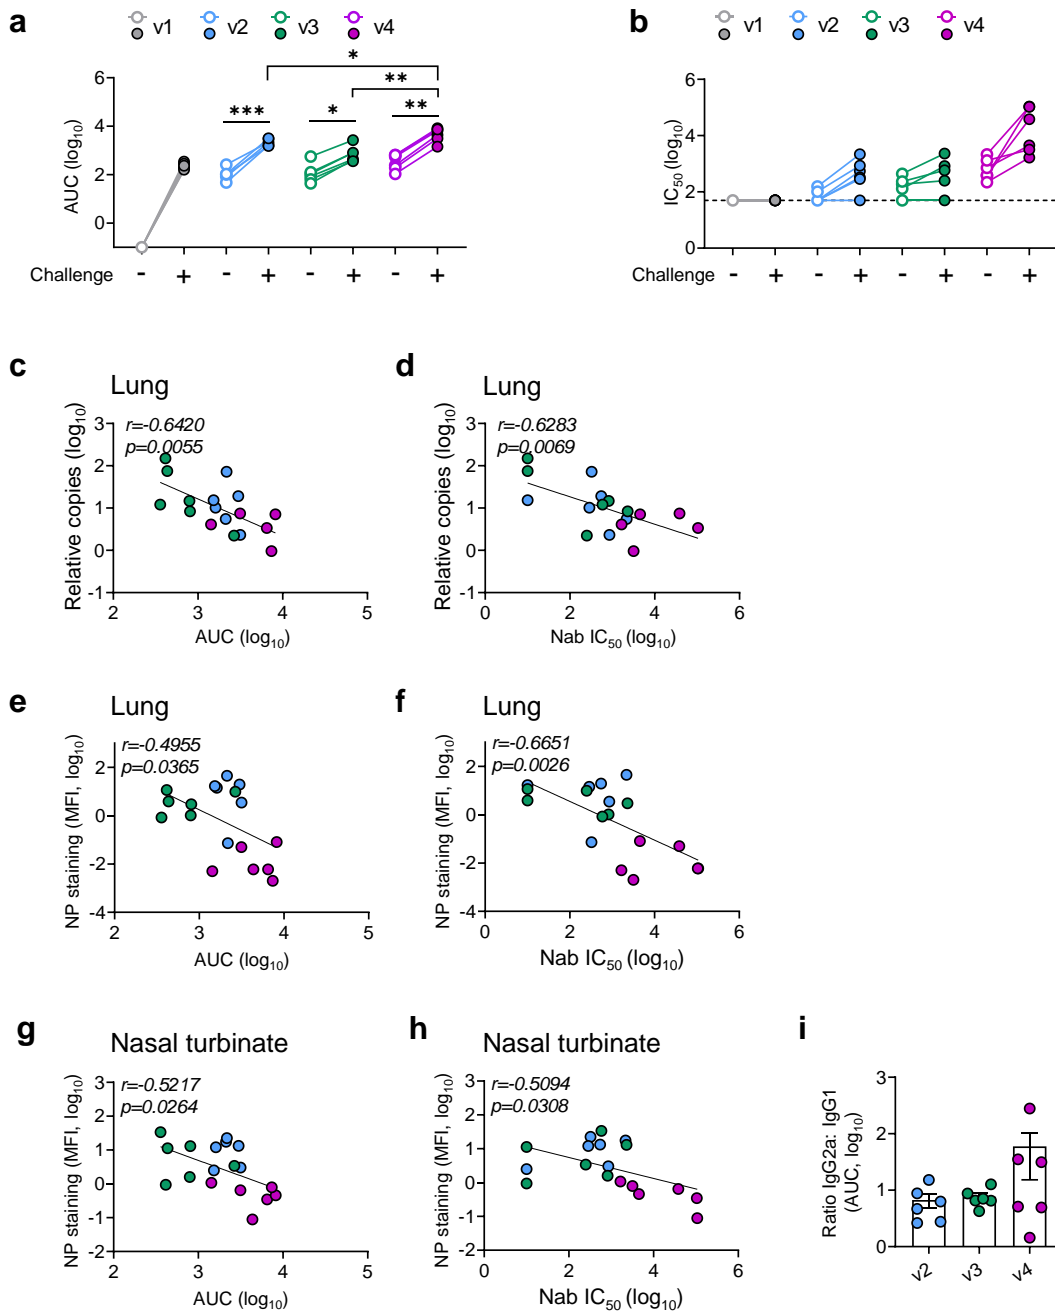

**Fig. S4. Infection-recalled NAb for correlate of protection.** Blood samples were collected at 28 and 39 days (also 4 dpi) after the 2<sup>nd</sup> vaccination for analysis. **(a, b)** The mean  $\pm$  SEM changes of anti-RBD IgG AUC titer **(a)** and neutralizing  $IC_{50}$  values **(b)** were determined by anti-RBD IgG ELISA and pseudovirus assay, respectively. Each color represents a vaccination regimen. Each symbol represents an individual mouse. Statistics were generated using the 2-tailed Student's t-test. \* $p < 0.05$ ; \*\* $p < 0.01$ ; \*\*\* $p < 0.001$ . **(c)** Viral load in lung correlated with serum IgG titer. **(d)** Viral load in lung correlated with serum NAb titer. **(e)** NP<sup>+</sup> cell in lung correlated with serum IgG titer. **(f)** NP<sup>+</sup> cell in lung correlated with serum NAb titer. **(g)** NP<sup>+</sup> cell in NT correlated with serum IgG titer. **(h)** NP<sup>+</sup> cell in NT correlated with NAb titer. Correlation analysis was performed by linear regression using GraphPad Prism 8.0. **(i)** The ratios of IgG1:IgG2a AUC titers were determined by anti-RBD IgG ELISA. Each symbol represents an individual mouse. Error bars indicate standard errors of the mean values.
