# Supplementary material
Source: PubMed Central journal article supplement (PMC8713126)
Supplement: mmc5.pdf [file mmc5.pdf]

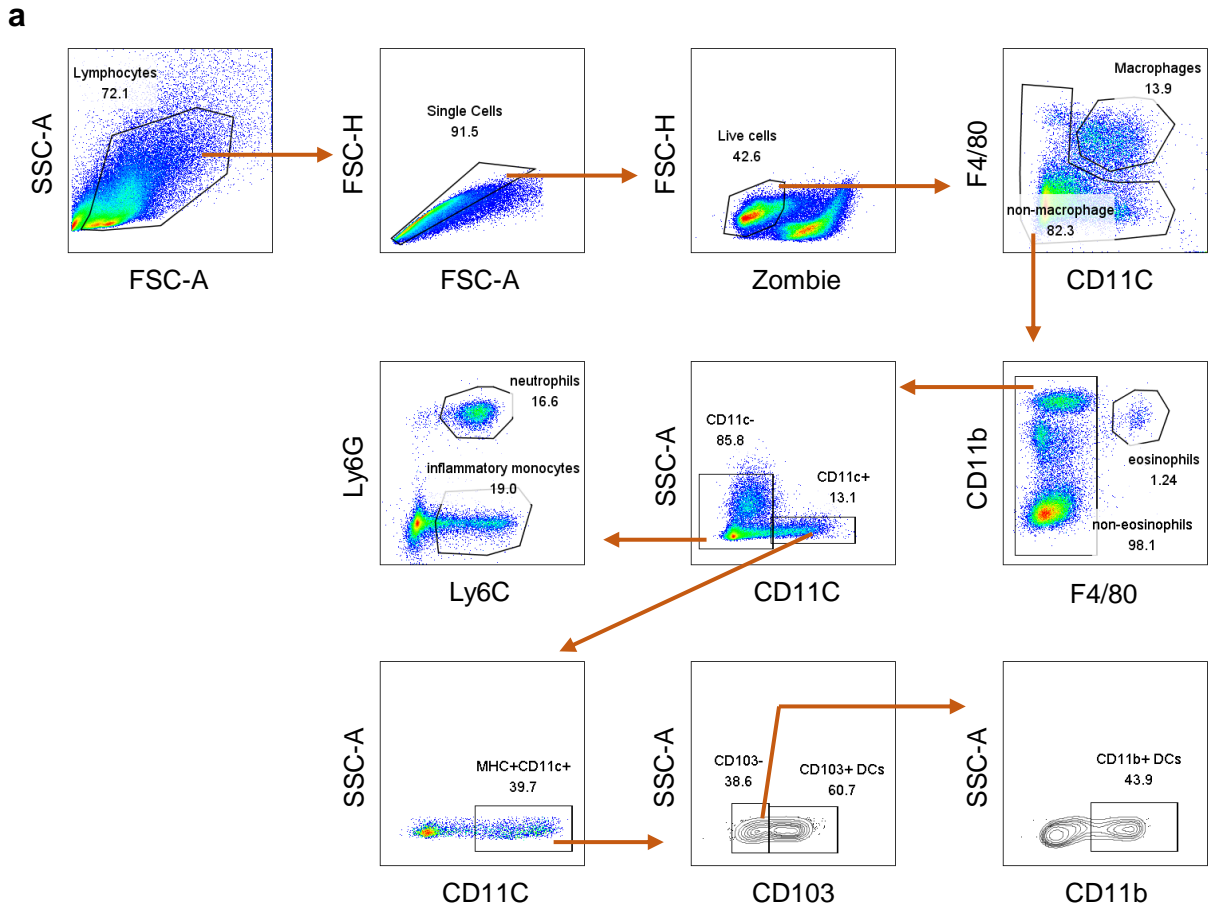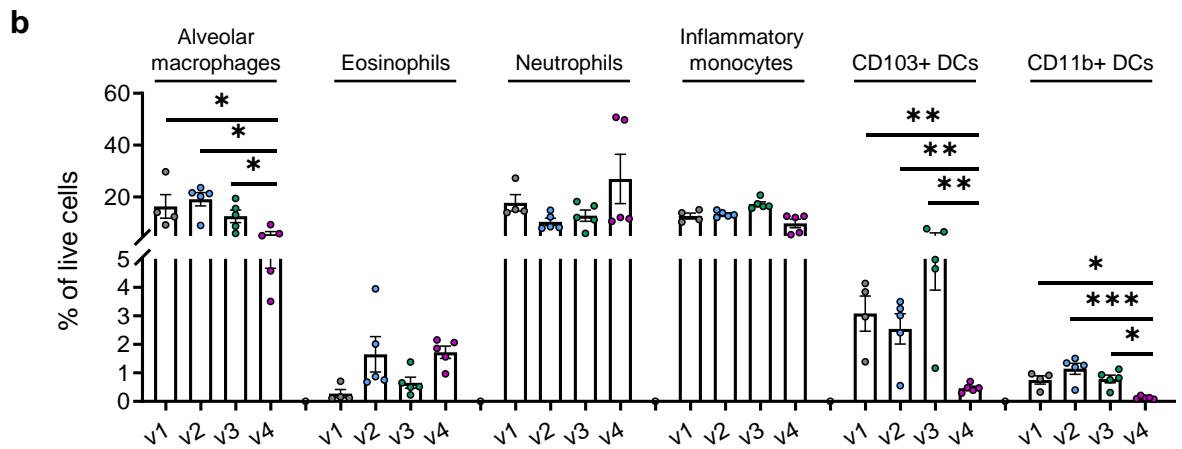

**Fig. S5. Flow cytometry analysis of immune cell composition in lung of K18-hACE2 mice at day 4 post infection.** (a) Flow cytometric gating strategy for lung tissue analysis. (b) Frequencies of different immune cells in live lung cells. Statistics were generated using the 2-tailed Student's t-test. \* $p < 0.05$ ; \*\* $p < 0.01$ ; \*\*\* $p < 0.001$ .
