# Supplementary material
Source: PubMed Central journal article supplement (PMC8713126)

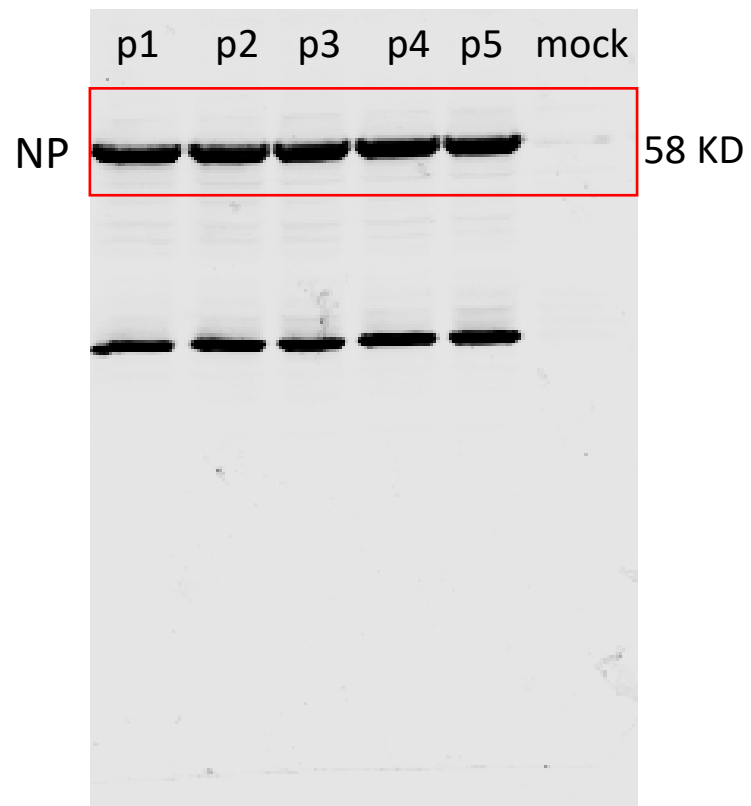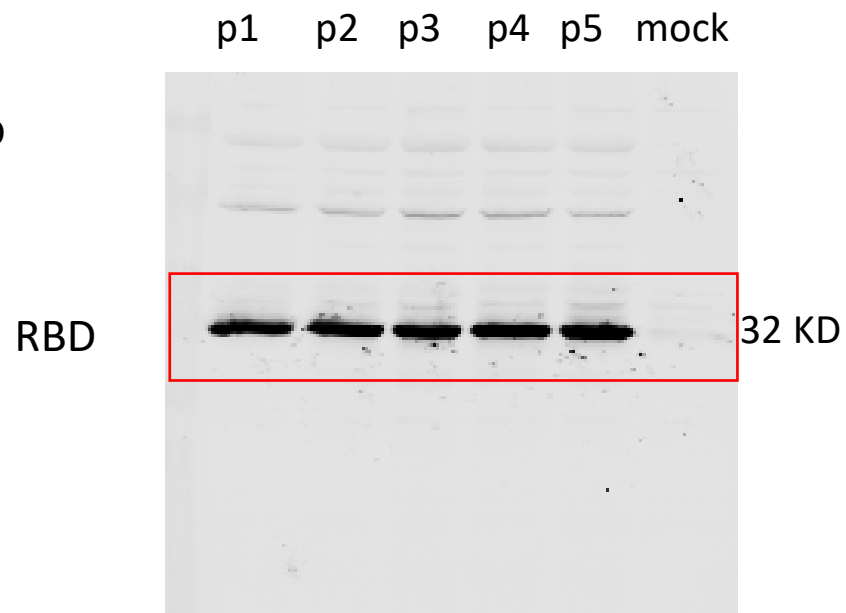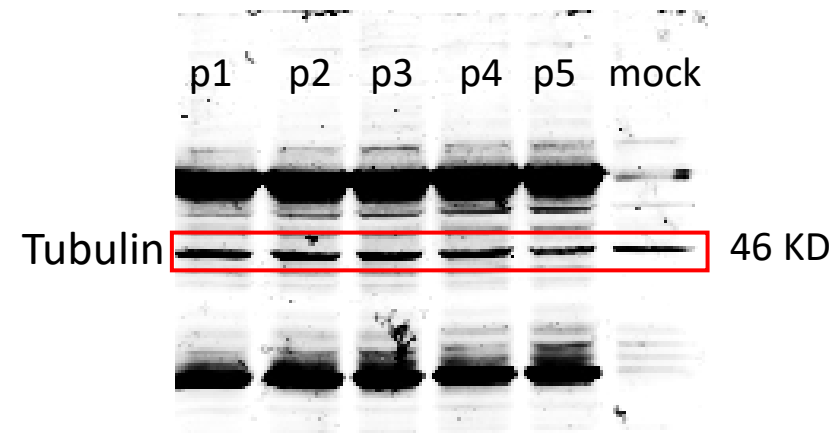

Supplemental western blot for Fig. S1e

Supplement: mmc6.pdf [file mmc6.pdf]
